# Supplementary material for: Dopamine promotes instrumental motivation, but reduces reward-related vigour
Source: PubMed Central journal article supplement (PMC7599069; doi:10.7554/elife.58321), 2020-10-01

### Contingent Effect: ON - OFF

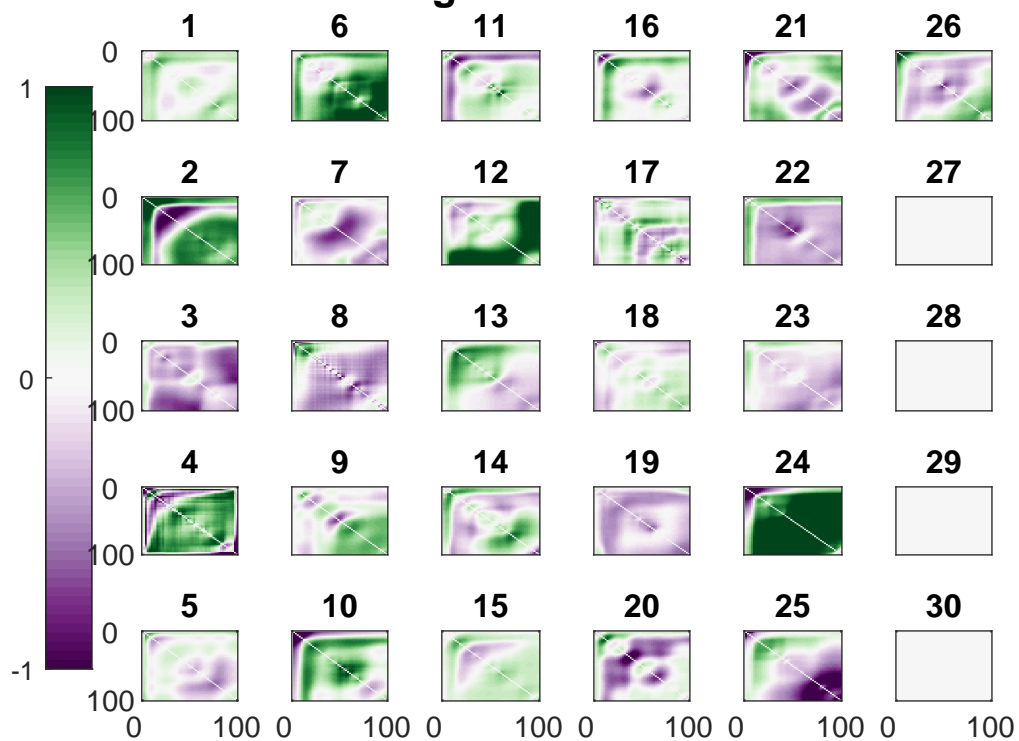

### Contingent Effect: ON

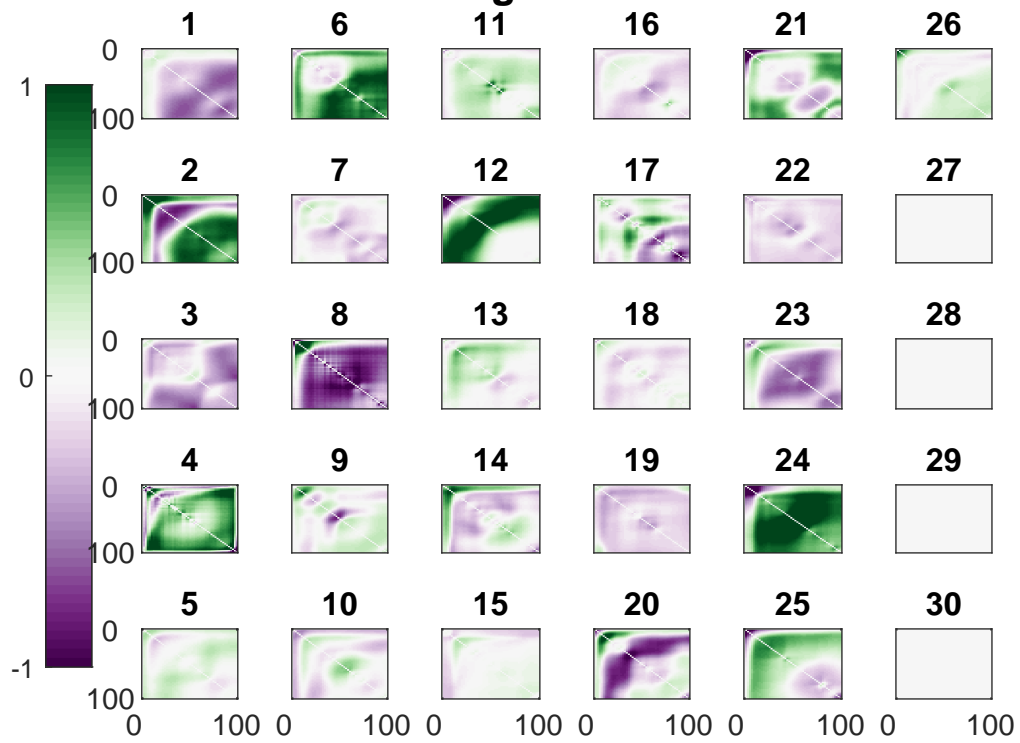

### Contingent Effect: OFF

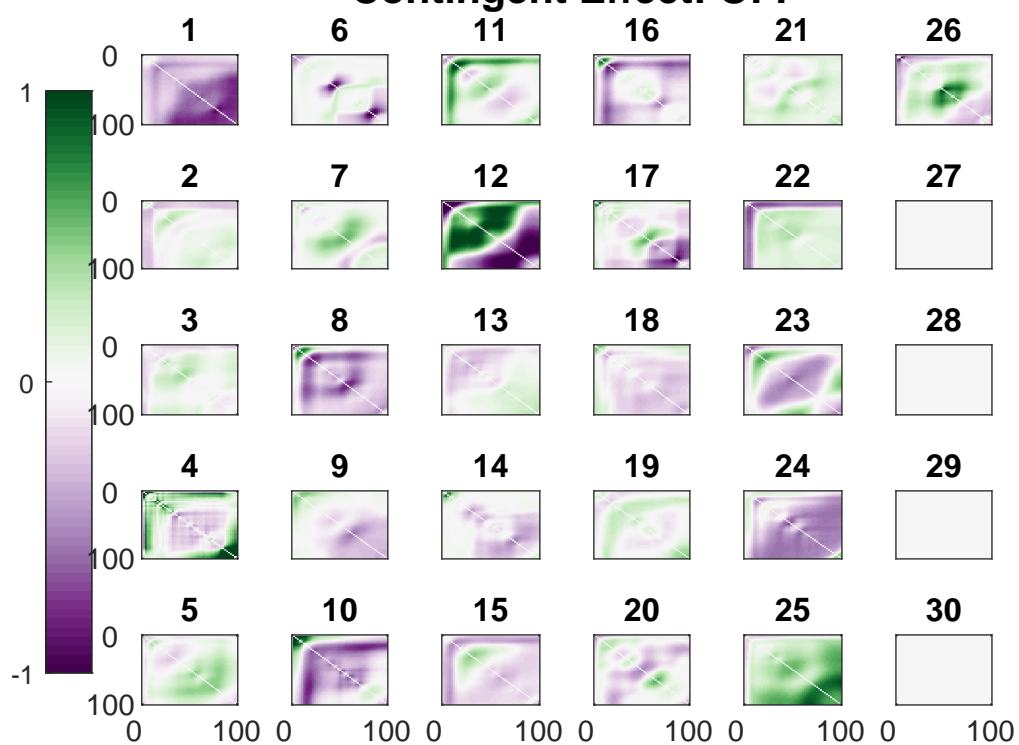

### Contingent Effect: HC

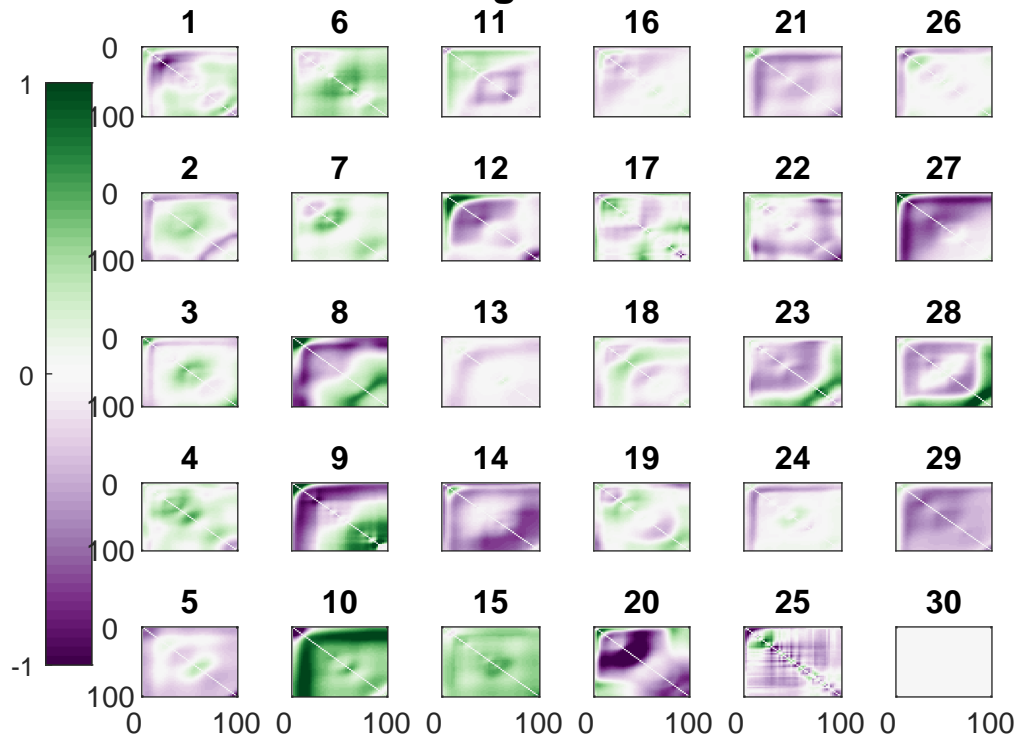

### Guaranteed Effect: ON - OFF

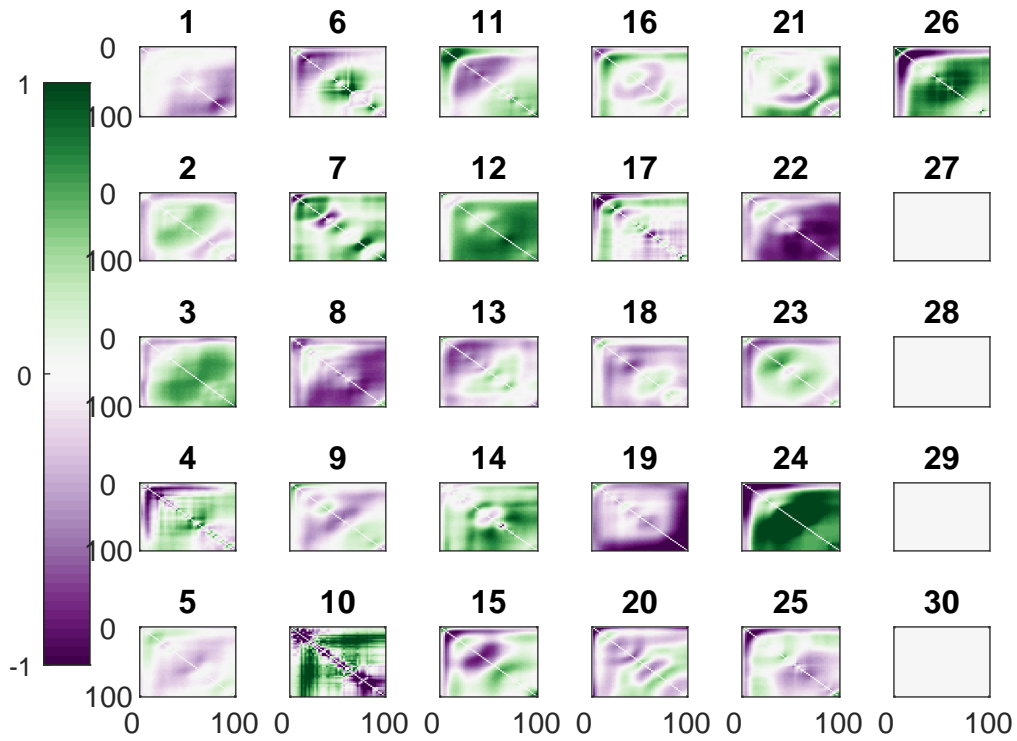

### Guaranteed Effect: ON

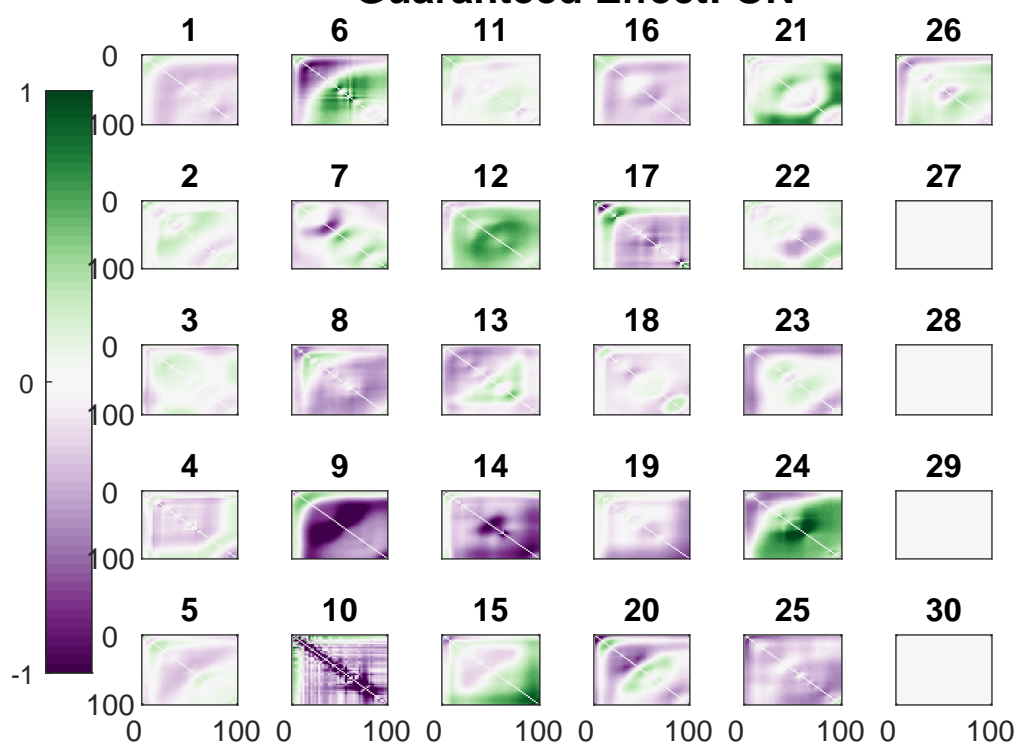

### Guaranteed Effect: OFF

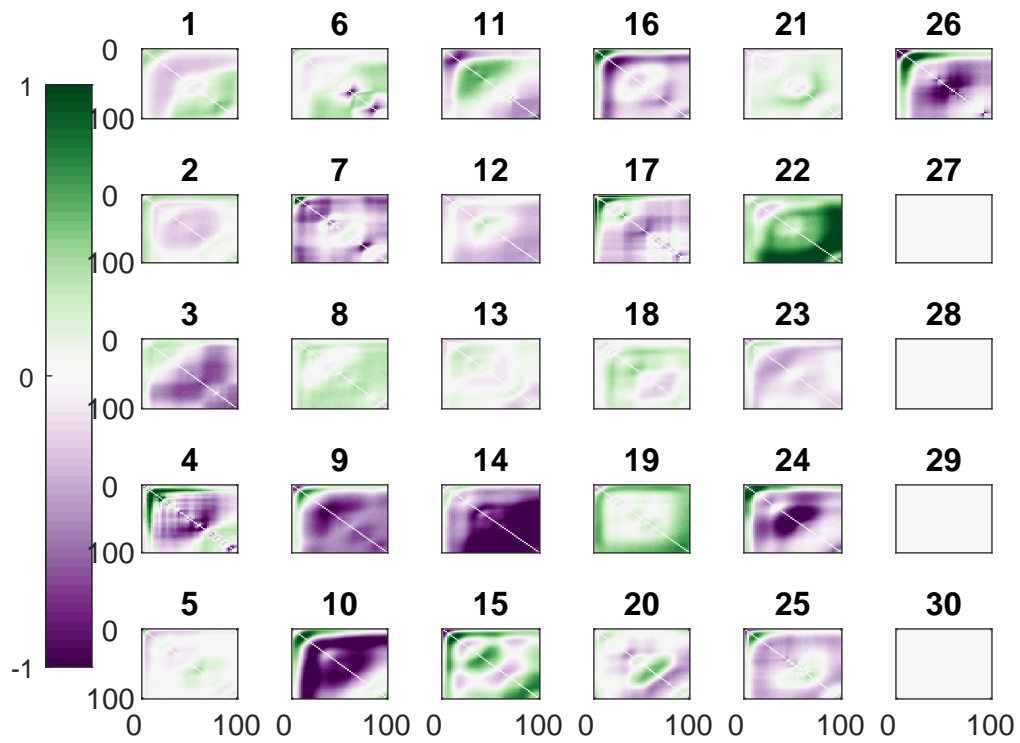

### Guaranteed Effect: HC

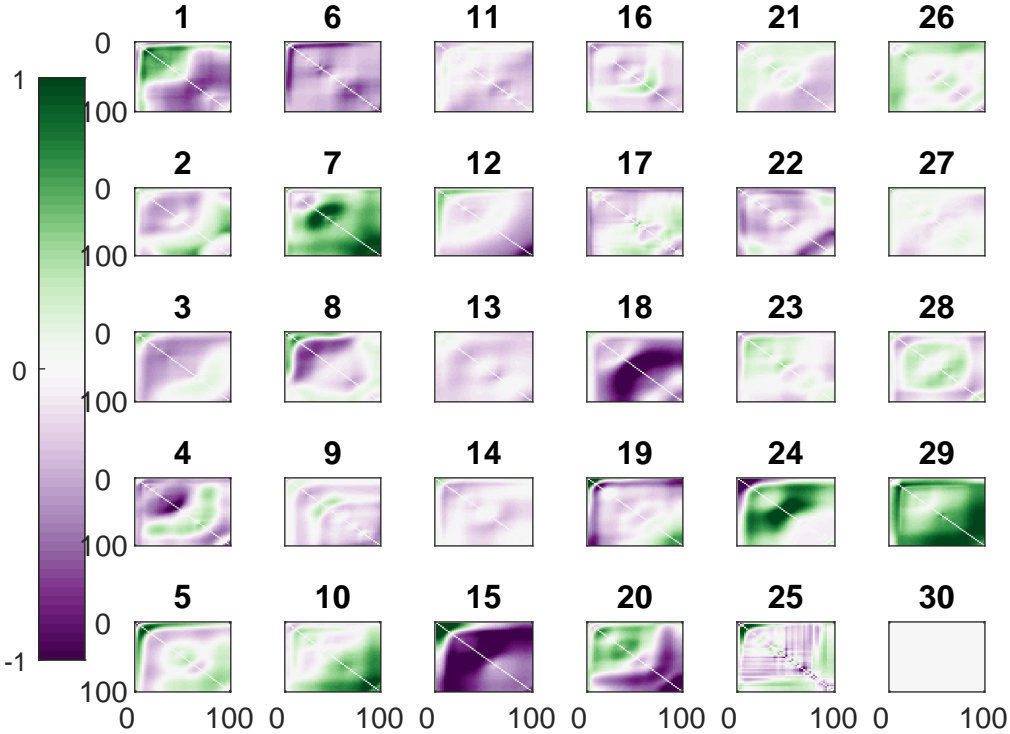

Supplement: elife-58321-fig4-data2.pdf [file elife-58321-fig4-data2.pdf]
