# Supplementary figures and images for: Dopamine promotes instrumental motivation, but reduces reward-related vigour
Source: eLife journal article supplement (doi:10.7554/elife.58321), 2020-10-01

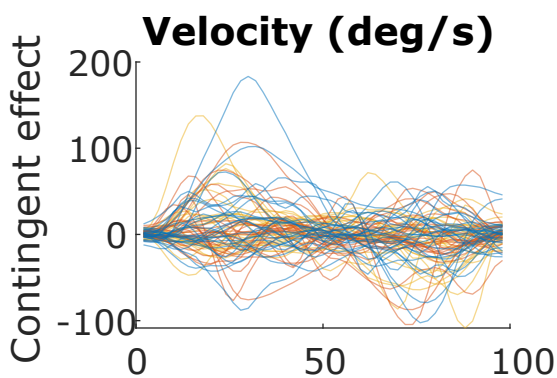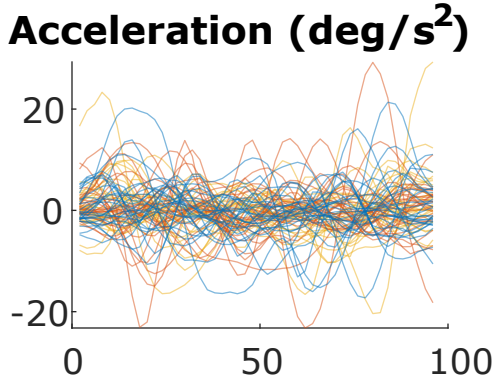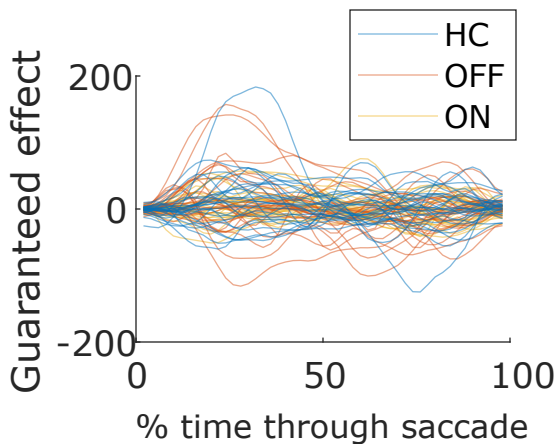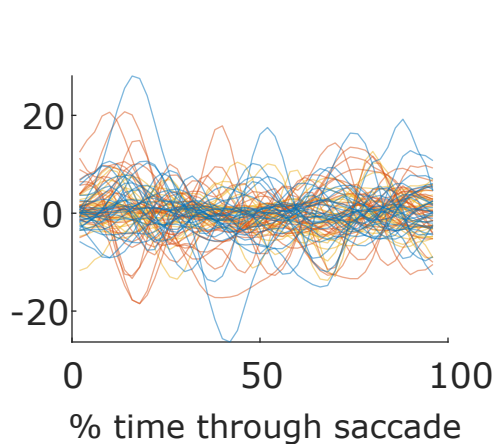

Supplement: supp [file elife_poa_e58321_Figure_3_figure_supplement_1.pdf › elife_poa_e58321_Figure_3_figure_supplement_1.pdf]

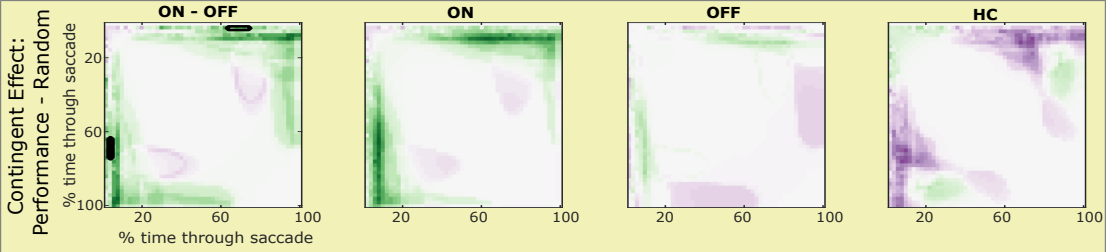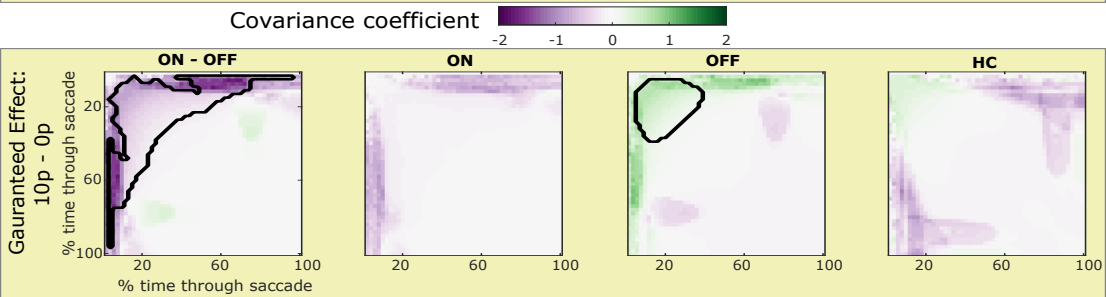

Supplement: supp [file elife_poa_e58321_Figure_4_figure_supplement_2.pdf › elife_poa_e58321_Figure_4_figure_supplement_2.pdf]

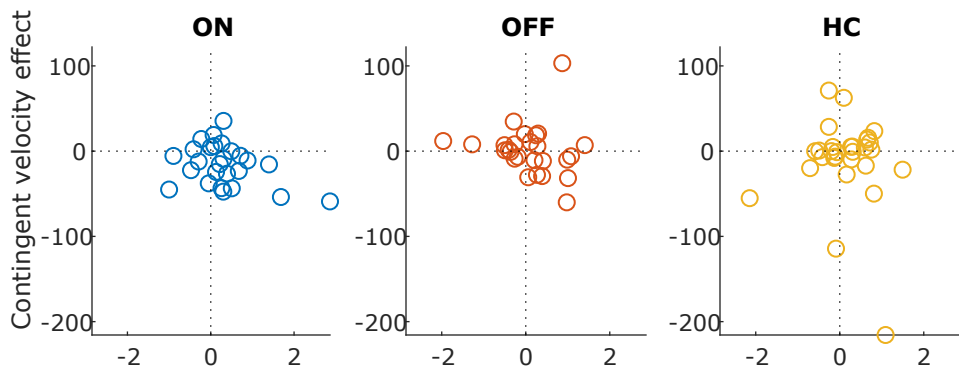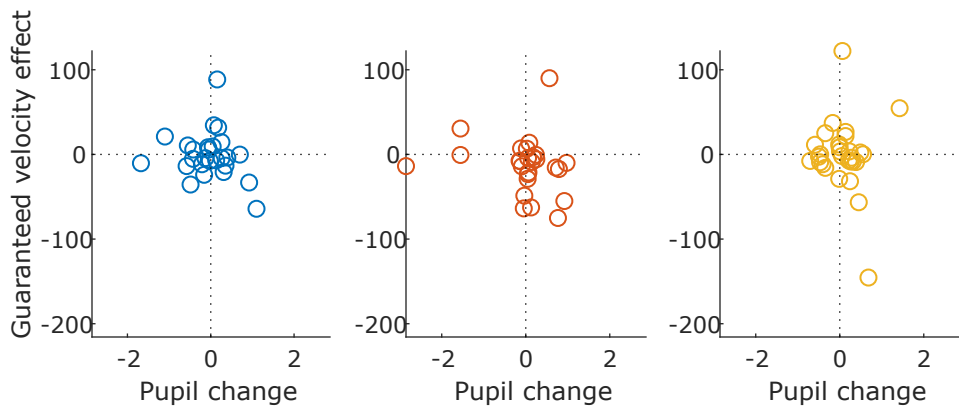

Supplement: supp [file elife_poa_e58321_Figure_6_figure_supplement_1.pdf › elife_poa_e58321_Figure_6_figure_supplement_1.pdf]

## Pupil dilatation (a.u.)

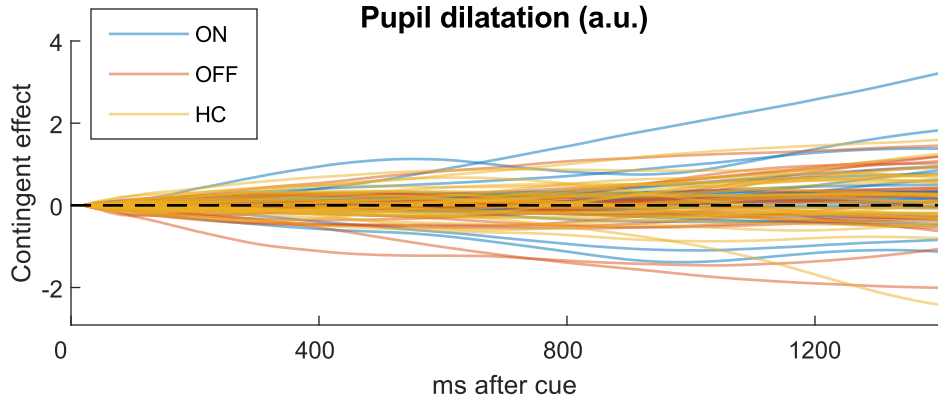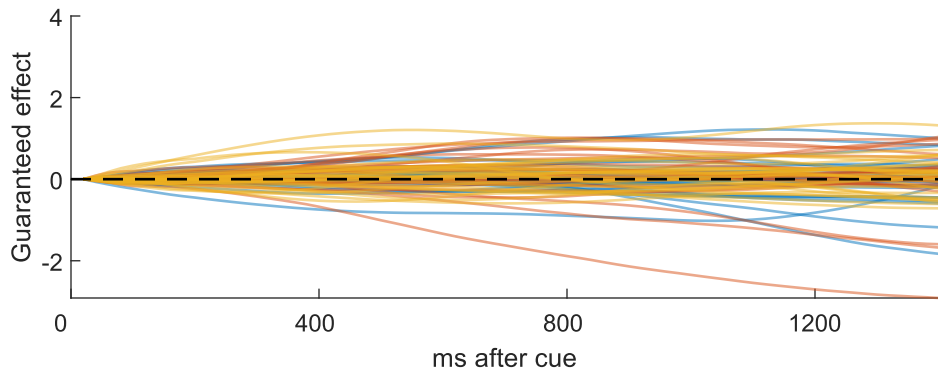

Supplement: supp [file elife_poa_e58321_Figure_6_figure_supplement_2.pdf › elife_poa_e58321_Figure_6_figure_supplement_2.pdf]
